1 **Title: The relationship between cardiopulmonary size and aerobic performance in adult**  
2 **deer mice at high altitude**

3  
4 **Authors:** Nicholas J. Shirkey, and Kimberly A. Hammond □

5 *Department of Biology, University of California, Riverside, Riverside, CA 92521,*

6 **Corresponding author:** shirkey.nicholas@gmail.com, Phone (415) 246-0973

7  
8 **Short title: Plasticity & aerobic performance in mice**

9 **Key words:** Deer mice, *Peromyscus maniculatus sonoriensis*, phenotypic plasticity, lung  
10 volume, hypoxia, high altitude, aerobic performance

11  
12 **Summary**

13 Deer mice (*Peromyscus maniculatus sonoriensis*) populations in the White Mountains of  
14 Eastern California are found across a substantial range of partial pressures of oxygen (pO<sub>2</sub>).  
15 Reduction in pO<sub>2</sub> at high altitude can have a negative impact on aerobic performance. We  
16 studied plastic changes in organ mass and volume involved in aerobic respiration in response to  
17 acclimation to high altitude, and how those changes are matched with aerobic performance  
18 measured by  $\dot{V}\dot{O}_2$  max. Adult deer mice born and raised at 340 m were acclimated at either 340  
19 m or 3800 m for a period of nine weeks. Lung volume increased by 9% in mice acclimated to  
20 high altitude.  $\dot{V}\dot{O}_2$  max was also significantly higher under hypoxic conditions after high  
21 altitude acclimation compared to controls. Body mass corrected residuals of  $\dot{V}\dot{O}_2$  max were  
22 significantly correlated with an index of cardiopulmonary size (summed standardized residuals  
23 of lung volume and heart mass) under both hypoxic and normoxic conditions. These data show  
24 that phenotypic plasticity in lung volume and heart mass plays an important role in maintaining  
25 aerobic performance under hypoxic conditions, and account for up to 55% of the variance in  
26 aerobic performance.

27  
28 **Introduction**

29 Aerobic performance is an emergent trait that is dependent on a cascade of oxygen  
30 moving from the environment to the cells via a pathway that involves multiple organ systems  
31 (Weibel et al., 1981; Bassett and Howley, 2000). These organs must work together to support the

32 aerobic metabolism of the whole animal, and even small changes in the environment can impact  
33 the function of one or more of these systems resulting in a change in organismal performance.  
34 Populations of organisms living in areas of harsh abiotic conditions need to be equipped to deal  
35 with a variety of conditions. For example, animals living at high altitude must be able to survive  
36 and be active in particularly harsh conditions. Several biotic and abiotic factors vary with  
37 altitude including temperature, primary productivity, and UV exposure. However, perhaps the  
38 most important difference is the reduced ambient partial pressures of oxygen ( $pO_2$ ) at high  
39 altitude.

40         Organisms that live at high altitudes generally must adapt to the lower levels of oxygen  
41 or face reduced aerobic performance as a result, either through evolutionary processes (genetic  
42 changes across generations) or phenotypic plasticity (physiological changes during an  
43 individual's lifespan) (Garland and Carter, 1994). Although some evolutionary changes have  
44 been documented in species that inhabit high altitudes, such as hemoglobin polymorphisms in  
45 deer mice (*Peromyscus maniculatus*) (Chappell and Synder, 1984; Storz et al., 2009; Storz et al.,  
46 2010a), phenotypic plasticity remains an important way to maintain aerobic performance in the  
47 face of environmental heterogeneity.

48         Because deer mice are widely distributed, both geographically throughout North  
49 America, and across a wide altitudinal range they have been a model system for the study of  
50 mammalian high altitude physiology. One subspecies, *P. maniculatus sonoriensis* is found across  
51 eastern California and has an altitudinal range that extends from below sea level in Death Valley,  
52 CA to over 4000 m in the Sierra Nevada and White Mountains (Sawin, 1970). These mice  
53 possess evolutionary adaptations to high altitude such as the aforementioned hemoglobin  
54 polymorphisms. Phenotypic plasticity also plays a major role in acclimation to high altitude both  
55 during development and adulthood. Wild caught mice at high altitude tended to have improved  
56 thermogenic performance relative to low altitude controls even when seasonal effects are taken  
57 into account (Hayes 1989). Likewise mice born at high altitude perform better during exercise  
58 tests than low altitude born mice acclimated to high altitude (Chappell et al. 2007).

59         The change in whole-animal aerobic capacity resulting from acclimation to high altitude  
60 is accompanied by increased hematocrit, hemoglobin concentration, and lung mass compared to  
61 animals acclimated to low altitude (Hammond et al., 1999; Hammond et al., 2001). Changes in  
62 splenic function have also been noted in response to high altitude acclimation, as it is generally

63 considered to be associated with storage of red blood cells (Baker and Remington, 1960; Boning  
64 et al., 2011). For example in thirteen-lined ground squirrels (*Ictidomys tridecemlineatus*),  
65 splenectomy results in a reduced hematocrit in response to low pO<sub>2</sub> (Mcglaglin et al., 1972).  
66 These changes occur in systems that directly impact the oxygen cascade and it has been assumed  
67 they are at least partially responsible for maintenance of aerobic performance in high altitude  
68 natives.

69 More recently work has been conducted to determine if the phenotypic differences  
70 between altitude levels are related to performance. These studies have shown that while there is a  
71 genetic basis to many of the differences in thermogenic performance of deer mice from different  
72 altitudes (Cheviron et al. 2012), plasticity plays an important role as well (Cheviron et al. 2013).  
73 Furthermore, these studies have demonstrated a link between plasticity in thermogenic  
74 performance and subordinate changes in transcriptional profiles (Cheviron et al. 2014).

75 In this study we set out to build on recent efforts to illuminate the importance of plastic  
76 changes in the maintenance of organismal performance at high altitude. We set about to test the  
77 hypothesis that phenotypic changes, such as changes in hematocrit or lung volume, support  
78 aerobic performance in hypoxic conditions at high altitude. Our experimental design involved  
79 using a low altitude born captive colony of deer mice. The mice in this colony were all derived  
80 from a wild population of deer mice captured at high altitude in the White Mountains of eastern  
81 California. Mice from this colony were either maintained at low altitude (LA; vivarium at 380 m-  
82 -no real acclimation; Control group) or moved to high altitude (HA; 3800 m--true acclimation)  
83 for nine weeks and then tested at both altitudes to challenge that acclimation (Fig. 1). We  
84 measured the mass of the spleen, heart, lung (lobar) volume, and aerobic performance ( $V\dot{V}O_2$   
85 max) of all individuals. The aerobic performance was measured both before the experiments  
86 started and then at the end of the acclimation trials. We made three predictions in relation to our  
87 hypothesis:

- 88 1. Mice acclimated to high altitude will show improved aerobic performance ( $V\dot{V}O_2$  max  
89 during exercise) under both hypoxic and normoxic conditions.
- 90 2. Mice acclimated to high altitude will have greater heart mass, lung volume, and hematocrit.
- 91 3. Mice with higher cardiopulmonary residuals and hematocrit levels will have higher  $V\dot{V}O_2$   
92 max residuals.

93

## 94 **Results**

### 95 *Body mass*

96 Body mass was not significantly different between HA and LA groups prior to the start of  
97 the acclimation process (HA =  $24.44 \pm 0.78$  g, LA =  $23.97 \pm 0.74$  g,  $F_{1,17} = 0.18$ ,  $P = 0.67$ ), and  
98 at the time of sacrifice (Fig. 2A; Table 1) (HA =  $23.52 \pm 0.60$  g, LA =  $24.01 \pm 0.76$  g,  $F_{1,17} =$   
99  $0.27$ ,  $P = 0.61$ ).

100

### 101 *Hematocrit and spleen measurements*

102 Hematocrit was similar between the HA ( $46.9 \pm 1.55$  %) and LA ( $47.04 \pm 0.83$  %) groups at  
103 the time of sacrifice (Fig. 2B; Table 1) ( $F_{1,17} = 0.007$ ,  $P = 0.93$ ).

104 Dry spleen mass was also not significantly different ( $F_{1,17} = 0.22$ ,  $P = 0.65$ ) between HA  
105 ( $0.0076 \pm 0.0015$  g) and LA ( $0.0069 \pm 0.0006$  g) groups (Table 1). However, because past studies  
106 have consistently shown that deer mice acclimated to high altitude have increased hematocrit  
107 (8% higher) and hemoglobin concentrations (10% higher) compared to those at low altitude  
108 (Hammond et al., 2001; Hammond et al., 2002; Tufts et al., 2013), we also examined the  
109 relationship between spleen size and hematocrit in the HA mice. If red blood cells were  
110 sequestered in the spleen during their short time at low altitude, it might be expected that animals  
111 with a greater spleen mass would have lower values for hematocrit. To test this hypothesis we  
112 regressed hematocrit on dry spleen mass in the HA animals, and found a highly significant  
113 negative correlation of  $r = -0.771$  ( $F_{1,8} = 11.71$ ,  $P = 0.0091$ ).

114

### 115 *Cardiopulmonary organs*

116 Body mass was not a significant covariate for either wet heart mass ( $F_{2,15} = 3.69$ ,  $P = 0.07$ )  
117 or dry heart mass ( $F_{2,15} = 1.36$ ,  $P = 0.26$ ), and heart mass did not vary significantly with acclimation  
118 altitude in either wet ( $F_{2,15} = 2.64$ ,  $P = 0.13$ ), or dry measurements ( $F_{2,15} = 1.86$ ,  $P = 0.19$ ). The body  
119 mass corrected mean dry heart mass was 8% higher in the HA group ( $0.0415 \pm 0.0015$  g)  
120 compared to the LA group ( $0.0384 \pm 0.0016$  g) (Fig. 2C) though this difference was not  
121 significant ( $T_{16} = 1.79$ ,  $P = 0.091$ ).

122 Mice acclimated to high altitude had 8% larger body mass corrected lung volume than  
123 low altitude controls (HA  $0.91 \pm 0.019$  ml, LA  $0.84 \pm 0.017$  ml;  $F_{2,15} = 6.84$ ,  $P = 0.020$ ). Likewise the  
124 summed lobar volume of the lung was 9% greater in the HA group (HA  $0.80 \pm 0.017$  ml, LA

125 0.73±0.025 ml;  $F_{2,15}=4.55$ ,  $P=0.050$ ) (Fig. 2D). In both cases body mass was a significant  
126 covariate.

### 127 *Maximal oxygen consumption*

128 All values of  $V\dot{V}O_2$  max were corrected for body mass using residuals of linear  
129 regression. Initial aerobic performance under normoxic conditions did not differ significantly  
130 between the treatment groups (HA=4.59±0.13 ml•min<sup>-1</sup>, LA=4.42±0.20 ml•min<sup>-1</sup>;  $F_{2,15}=1.02$ ,  
131  $P=0.383$ ). A repeated measures ANOVA of post acclimation aerobic performance under  
132 normoxic and hypoxic conditions revealed a significant effect of acclimation altitude on  $V\dot{V}O_2$   
133 max ( $F_{1,16} = 8.86$ ,  $P = 0.0089$ ) such that HA mice performed better than LA controls. To  
134 determine if this was true in both hypoxic and normoxic conditions subsequent post-hoc tests  
135 were performed. These tests showed that HA mice performed significantly better than LA mice  
136 under hypoxia ( $z = 3.36$ ,  $P = 0.0042$ ), but not in normoxia ( $z = 1.58$ ,  $P = 0.38$ ) (Fig. 3). All mice  
137 did better in normoxia than in hypoxia regardless of their acclimation altitude ( $F_{1,16} = 32.58$ ,  $P <$   
138  $0.0001$ ), which was supported by subsequent post hoc analysis. However, HA mice experienced  
139 only a 9% reduction in  $V\dot{V}O_2$  max under hypoxic conditions versus normoxia compared to the  
140 16.5% loss in performance observed in low acclimated mice. Under the  $pO_2$  from their respective  
141 acclimation regimes, HA under hypoxia and LA under normoxia, mice showed no significant  
142 differences in aerobic performance ( $z = -0.78$ ,  $P = 0.86$ ), suggesting that HA mice are able to  
143 maintain the same level of performance as LA mice even when they are experiencing reduced  
144  $pO_2$ .

145

### 146 *Regression of cardiopulmonary size on $V\dot{V}O_2$ max*

147 The complete regression model used included either residuals of  $V\dot{V}O_2$  max under  
148 normoxic or hypoxic conditions from post-acclimation runs as the dependent variable and dry  
149 heart mass residuals, lobar volume residuals, and hematocrit as the independent variable. We  
150 used residuals of  $V\dot{V}O_2$  max, lobar volume, and heart mass to remove the effect of body mass.

151 Stepwise analysis showed that hematocrit was not a significant predictor of maximal  
152 aerobic capacity in either the hypoxia or normoxia, and thus was removed from subsequent  
153 analyses. Inclusion of both heart mass and lobar volume produced the best model fit in both the  
154 hypoxia run ( $F_{2,15}=9.29$ ,  $P=0.0018$ ) and the normoxia run ( $F_{2,15}=10.71$ ,  $P=0.0013$ ) with  $R^2$  of  
155 0.570 and 0.588 respectively. For hypoxia  $V\dot{V}O_2$  max both heart mass ( $t_{15}=3.55$ ,  $P=0.0029$ ) and

156 lobar volume ( $t_{15}=2.58$ ,  $P=0.024$ ) explained a significant proportion of the variance in  $V\dot{V}O_2$   
157 max with squared semipartial correlation coefficients of  $r^2_{Y(H,L)} = 0.361$  and  $r^2_{Y(L,H)} = 0.181$   
158 respectively. Both heart mass ( $t_{15}=4.06$ ,  $P=0.0010$ ) and lobar volume ( $t_{15}=2.02$ ,  $P=0.061$ ) were  
159 also important in explaining the variance in the normoxia run  $V\dot{V}O_2$  max with corresponding  
160 squared semipartial correlation coefficients of  $r^2_{Y(H,L)} = 0.452$  and  $r^2_{Y(L,H)} = 0.112$ . Further  
161 reduction of the model to just heart mass resulted in a reduction of the  $R^2$ , and trimming the  
162 model to lobar volume alone produced a non-significant result.

163 Regression of  $V\dot{V}O_2$  max residuals on the summed standardized cardiopulmonary size  
164 gave similar results. The  $R^2$  values for the regression of  $V\dot{V}O_2$  max under normoxia and hypoxia  
165 were 0.534 (Fig. 4A) and 0.555 (Fig. 4B) respectively. It was not possible to further partition the  
166 variance for lung volume and heart mass. However the summed cardiopulmonary size was a  
167 significant predictor of aerobic performance under both normoxia ( $F_{1,16} = 18.33$ ,  $P = 0.00057$ )  
168 and hypoxia ( $F_{1,16} = 19.95$ ,  $P = 0.00039$ ).

169

## 170 Discussion

171 In this study we show a concrete link between phenotypic changes resulting from  
172 hypoxic exposure and whole organismal performance. We do this in the context of a novel  
173 experimental design that allows for direct comparison between acclimated and control animals  
174 by use of repeated testing at all altitudes. The power of this study thus comes from the ability to  
175 match the size of organs directly related with the oxygen cascade with organismal performance.  
176 By doing so we are able to show that the relative sizes of the heart and lungs are important  
177 predictors of aerobic performance in individuals at high altitude.

178 Our measurements on lung volume are consistent with our previous findings of  
179 significantly larger lung mass in high altitude acclimated deer mice (Hammond et al., 2001) and  
180 the 8-9% change in lung volume we found is consistent with the 9% increase in lung volume  
181 documented in guinea pigs (*Cavia porcellus*) developing at high altitude (Hsia et al., 2005).  
182 However, unlike other studies of mammals measured under similar protocols (Burri and Weibel,  
183 1971; Lechner and Banchero, 1981; Hsia et al., 2005; Ravikumar et al., 2009) at high altitude,  
184 the mice used in this study were all well into adulthood, suggesting that deer mice retain the  
185 capacity for substantial morphological changes even after development has ended. It will be  
186 important to follow up this work with studies to document how those volume changes are

187 manifested at the alveolar and diffusive interfaces within the lungs, but a study of that magnitude  
188 was not the aim of this project.

189         Although the 8% difference in heart mass we found between acclimation altitudes is not  
190 statistically significant, small changes in the heart mass of HA animals has been noted previously  
191 in guinea pigs exposed to hypoxia (Van Bui & Banchemo, 1980). Changes in heart mass due to  
192 hypoxia can be the result of right ventricular hypertrophy resulting from pulmonary hypertension  
193 (Rabinovitch et al., 1981; Reinke et al., 2011), which is generally considered maladaptive (Storz  
194 et al., 2010b), but could also potentially be the result of plasticity to improves cardiac output by  
195 hypertrophy of the left ventricle. It is also possible that the slightly lower (~6 °C differential)  
196 temperature at the high site was sufficient to induce a small degree of cold acclimation which can  
197 also result in increased heart mass (Van Bui & Banchemo, 1980; Hammond et al., 2001; Rezende  
198 et al., 2009), but the temperature difference observed in this paper is much smaller than the one  
199 induced in the aforementioned studies.

200         An unexpected result of this study was the lack of any difference in hematocrit between  
201 acclimation groups when measured at UCR at the end of the study. This was unexpected because  
202 in repeated published and unpublished work we have observed ~10% increase in hematocrit of  
203 high altitude acclimated mice from this same colony (Hammond et al., 1999; Hammond et al.,  
204 2001; Hammond et al., 2002). Because blood draws on deer mice can have a significant impact  
205 on aerobic performance up to two weeks after (Van Sant, 2012), we refrained from measuring  
206 hematocrit on HA animals while they were still at high altitude and waited until after their final  
207 normoxia run. Therefore, one possible explanation of the hematocrit results is that HA animals  
208 were able to sequester excess red blood cells into the spleen during the 1-2 days they were at  
209 UCR prior to hematocrit determination. The spleen acts as a reservoir for red blood cells in many  
210 mammals (Baker and Remington, 1960; Boning et al., 2011). Thus it is possible that mice  
211 acclimated to high altitude sequestered excess red blood cells in the spleen upon return to low  
212 altitude resulting in lower hematocrit than 1-2 days earlier at high altitude. The strong negative  
213 correlation between hematocrit and spleen mass strongly suggests that HA animals did exactly  
214 this after their return to low altitude and potentially explain why HA values of hematocrit  
215 approximated those of LA mice.

216         The reduction in aerobic performance between normoxic and hypoxic runs we observed  
217 in the HA group matches closely the difference reported between high and low altitude

218 acclimated mice in previous studies (e.g. Chappell et al., 2007). In fact, the aerobic performance  
219 of HA mice under hypoxic conditions was not significantly different from that of LA mice under  
220 normoxia. These results demonstrate once again the capacity of these animals to compensate  
221 aerobic capacity in spite of a reduction of alveolar  $pO_2$  of up to 37% based on changes in  
222 barometric pressure and vapor pressure. Furthermore, the negligible difference in  $\dot{V}O_2$  max  
223 observed between the HA group compared to the LA group at their respective acclimation  $pO_2$   
224 strongly suggests that the physiological changes resulting from acclimation to hypoxia are  
225 responsible for this improvement in performance.

226         Because aerobic performance is based on a cascade of oxygen throughout the body and  
227 is, therefore, dependent on multiple systems, all measured variables that could influence  
228 performance were included in a correlation analyses. However, due to the limitations of this  
229 study not all subordinate traits that are responsible for steps in the oxygen cascade are  
230 represented, for example, lung capillary density, muscle capillary density, or mitochondrial  
231 density. Thus it is important to acknowledge that it is impossible to determine the importance of  
232 each of those subordinate traits to aerobic performance. In spite of this limitation the results of  
233 this study still highlight the fact that the included measures are able to account for a significant  
234 portion of the variance in aerobic performance.

235         The lack of significance of hematocrit in the final model is probably explained by the  
236 sequestration of red blood cells by the spleen in high altitude mice. Still, it cannot be said for  
237 certain if hematocrit would have been significant in the final model had it had been measured  
238 while the animals were still at high altitude. The high altitude acclimated mice were brought to  
239 low altitude to ensure that all animals were processed in a consistent manner, and it was not  
240 possible to get hematocrit measurements prior to the completion of all metabolic testing.

241         The importance of heart mass in explaining variance in aerobic performance was  
242 expected, due to its connection with cardiac output. The delivery of oxygenated blood from the  
243 lungs to the rest of the body is key step in the cascade of oxygen and is dependent on bulk flow  
244 produced by contraction of the heart (stroke volume). Stroke volume is presumably greater in  
245 mice with relatively larger heart mass, and therefore for a given heart rate cardiac output should  
246 likewise be increased. At least in humans, that maximal cardiac output is likely the key limiting  
247 factor in aerobic performance (Bassett and Howley, 2000), thus the fact that heart mass  
248 explained up to 45% of the variance in our mice is unsurprising.



249 Perhaps more interesting is the fact that the significance of lobar volume as a predictor of  
250 aerobic performance was dependent on inclusion of heart mass as a predictor. Particularly in the  
251 case of the run in hypoxic conditions, the importance of the lung as a predictor of aerobic  
252 performance seems evident. By first principles it is reasonable to assume that any increase in  
253 lung volume may be accompanied by an increased surface for gas exchange, albeit not at the  
254 same rate, and hence a higher diffusive capacity for oxygen. Previous work has supported this  
255 observation that animals acclimated to high altitude develop increased surface area for diffusion  
256 (Hsia et al., 2005), but have also stated that diffusive capacity is also dependent on the rate of  
257 pulmonary blood flow (Yilmaz et al., 2008). Our results are consistent with the idea that large  
258 lungs cannot compensate for hypoxic limitations on aerobic performance unless coupled to  
259 enhanced cardiac output and hence a larger heart.

260 Furthermore, while classic work on the lungs suggests that diffusive capacity is in excess  
261 at sea level (Hsia et al., 2007; Weibel et al., 1981; Weibel et al. 1992), the significant correlation  
262 between lung volume and aerobic performance under hypoxia indicates that at low  $pO_2$  the  
263 diffusive capacity of the lungs may indeed become limiting, and may explain why many  
264 different types of vertebrates, from fish to mammals, invest in the growth of gas exchange organs  
265 in the presence of hypoxia (Burggren and Mwalukoma, 1983; Burri and Weibel, 1971; Lomholt  
266 and Johansen, 1979). As the  $pO_2$  gradient falls in the lung in response to hypoxia increasing the  
267 surface area should allow for greater diffusion and thus allow animals in hypoxic conditions to  
268 maintain aerobic performance. Thus, what has been sometimes characterized as an over-  
269 structuring of the lungs at sea level may be a form of evolutionary protection against hypoxia. If  
270 the excess capacity from sea level animals is completely used during acclimation to high altitude,  
271 then diffusive capacity of the lung should match aerobic performance under hypoxia. Tests such  
272 as this should be incorporated into future work to see if the phenotypic changes in lung volume  
273 are a part of ameliorating performance lost or not.

274 This study demonstrated a functional linkage between organ-level phenotypic changes  
275 and whole-animal aerobic performance. As with previous studies we found phenotypic changes  
276 (increased lung volume) in response to high altitude acclimation. We also showed that mice  
277 acclimated to high altitude have improved aerobic performance under hypoxic conditions  
278 compared to low acclimated mice. Lastly, we bridged the gap between organismal performance  
279 and subordinate traits, and showed that changes in organ size (lung) resulting from acclimation

280 are related to aerobic performance at the individual level. These results may have increasing  
281 significance as climate change continues, and other organisms seek cooler habitats by moving to  
282 higher elevations (Moritz et al., 2008). Past work has shown that low altitude natives do  
283 demonstrate an acclimation response to hypoxia (Beaudry and McClelland, 2010; Templeman et  
284 al., 2010). However, the question remains as to whether organisms that have evolved under the  
285 high pO<sub>2</sub> conditions of low altitude will demonstrate an acclimation response to hypoxia that  
286 matches the one exhibited by this population of deer mouse, which is originally native to high  
287 altitude, or if low pO<sub>2</sub> at high altitudes becomes a barrier for further movement. Future work  
288 might focus on an integrative approach that included measures from all steps in the oxygen  
289 cascade in order to attempt to discover the importance of each step to aerobic performance. Such  
290 work would make it possible to create a statistical model that accounts for changes at each step  
291 and allows us to answer questions about the importance of plasticity during acclimation.  
292 Additionally, it is important to compare the plastic responses of populations of *P. maniculatus*  
293 from low altitude to that of high altitude populations to answer questions regarding the evolution  
294 of plasticity. This could be expanded to test the plastic response of other species of *Peromyscus*  
295 that inhabit ranges that are much more restricted than *P. maniculatus*. Such studies would provide  
296 a better idea of how plastic response differ across population and species, and if our findings can  
297 be broadly generalized to other organisms.

298

## 299 **Materials and Methods**

### 300 *Animals*

301 We used 11 male and 7 female adult deer mice (*P. maniculatus sonoriensis*) for this  
302 study. Animals ranged from 382 days to 500 days in age and were captive bred at low altitude  
303 (340m) in a colony that was originally caught in the White Mountains of eastern California in  
304 1995. We prevented mice from producing more than one generation a year so this colony has  
305 been reproducing for no more than 18 generations. Additionally most families produced  
306 offspring for 2-3 years with a quiescent phase in the winter so, on average mice are no more than  
307 10-20 generations removed from the wild. Captive bred mice were used because of the risk of  
308 Hantavirus (which occurs in relatively high incidence in our study area) associated with trapping  
309 wild mice. While the colony has been removed from the wild for a substantial amount of time,  
310 and it is possible that the mice have been unintentionally selected for domestication, we have

311 done our best to maintain genetic variation. The same colony has been used extensively in the  
312 past (Chappell et al., 2007; Rezende et al., 2009; Russell et al., 2008; Van Sant and Hammond,  
313 2008). Mice were acclimated to one of two conditions; high acclimated (n=10) or low acclimated  
314 (n=8), for a period of nine weeks. The high altitude study site was the Barcroft Laboratory at the  
315 University of California's White Mountain Research Center (Barcroft; 3800 m elevation) and the  
316 low altitude study site was the University of California at Riverside Campus (UCR; 340 m  
317 elevation).

318 Animals were housed as individuals or pairs in plastic shoebox cages (27 cm x 21 cm x  
319 14 cm) with aspen shavings for bedding. They were given *ad libitum* food and water, and  
320 provided with approximately 1g of cotton for nesting. At Barcroft, cages were housed in a room  
321 with an average ambient temperature of  $16^{\circ}\text{C} \pm 2.27$  SD, exposed to the natural photoperiod.  
322 Ambient temperature was recorded every 30 min with a Stowaway XTI data-logger (Onset  
323 Computer Corp, Bourne, MA, USA) placed in an empty cage filled with bedding. Low altitude  
324 animals were housed in a vivarium at a near constant ambient temperature of about  $22^{\circ}\text{C}$  (range  
325  $21 - 23^{\circ}\text{C}$ ). The lights in the vivarium were set to 14 h:10 h light:dark (L:D) photoperiod to  
326 approximate the natural photoperiod at Barcroft.

327

### 328 *Aerobic performance by maximal oxygen consumption*

329 Maximal oxygen consumption ( $V\dot{V}\text{O}_2$  max), as an estimate of aerobic performance, was  
330 measured on all mice on three separate occasions (Fig. 1). First, we measured aerobic  
331 performance on all mice at low altitude; Second aerobic performance was measured after the 9-  
332 week acclimation period at the site of the acclimation (high or low altitude; see below for  
333 details). The third time aerobic performance was measured was at the 'challenge site'; this was  
334 at high altitude for the low altitude group or at low altitude for the high-altitude group.

335 At the beginning of the experiment, both groups of animals were housed in the UCR  
336 Vivarium. Prior to acclimation we measured the initial low altitude aerobic performance (pre  
337 acclimation run; ambient  $\text{pO}_2 \sim 150$  mm Hg,  $T \sim 20^{\circ}\text{C}$ ) of all 18 mice. Within a day of completing  
338 those initial measurements, 10 mice (high altitude acclimation treatment, HA) were moved to  
339 3800 m for nine weeks and 8 mice (low altitude acclimation treatment, LA) remained in the  
340 UCR Vivarium. At the end of nine weeks, the final low altitude aerobic performance (normoxia  
341 run; ambient  $\text{pO}_2 \sim 150$  mm Hg,  $T \sim 20^{\circ}\text{C}$ ) was again measured in the LA mice and within 48

342 hours that low altitude group was transported to Barcroft (3800 m) for twenty-four hours. At  
343 Barcroft we measured the final high altitude aerobic performance (hypoxia run; ambient  
344  $pO_2 \sim 100$  mm Hg,  $T \sim 19^\circ C$ ) for both treatment groups. Subsequently all mice were transported  
345 back down to UCR (low altitude). The final low altitude aerobic performance (normoxia run;  
346 ambient  $pO_2 \sim 150$  mm Hg,  $T \sim 20^\circ C$ ) was measured in the HA group within 24 hours of arrival  
347 back at UCR. This design was chosen as it tests mice first at their acclimation  $pO_2$  and then at a  
348 “challenge”  $pO_2$  to prevent any possible deacclimation from occurring prior to completion of  
349 runs. Though mice performed a second bout of  $\dot{V}O_2$  max within 48 hours of their first run there  
350 is no reason to believe that this was not sufficient time for recovery, as Belding’s ground  
351 squirrels (*Spermophilus beldingi*) have demonstrated high repeatability in exercise  $\dot{V}O_2$  max  
352 after only two hours (Chappell et al., 1995).

353 Although this experimental design involved the transport of mice in potentially stressful  
354 conditions (being in a vehicle 6 hours between Riverside CA and the high altitude site near  
355 Bishop) it allowed us to ensure that all animals were exposed to the same ambient and  
356 atmospheric conditions during the aerobic performance measurements. We have had a great deal  
357 of experience with transporting mice up and down the mountain in an air-conditioned vehicle  
358 and have found that with apples for hydration and food and adequate time to rehydrate upon  
359 arrival to a new site, they handle this disruption relatively well.

360 Maximal oxygen consumption was measured by open flow respirometry during forced  
361 treadmill exercise. Air was supplied either by outlet (UCR) or using a positive pressure pump  
362 (Barcroft). Incurrent air was dried by Drierite™ (Xenia, OH, USA) and scrubbed of carbon  
363 dioxide by soda lime. Flow rate was regulated by Porter mass flow controllers (Hatfield, PA,  
364 USA) upstream of the treadmill. The treadmill’s working section was enclosed by Plexiglas with  
365 dimensions of 6 cm x 7 cm x 13 cm. Flow rates of 2300 ml min<sup>-1</sup> and 1550 ml min<sup>-1</sup> standard  
366 temperature and pressure (STP) were used at UCR and Barcroft correspondingly. Approximately  
367 150 ml min<sup>-1</sup> of excurrent air was subsampled, then dried and scrubbed of CO<sub>2</sub> before being  
368 routed through the oxygen sensor. Oxygen concentration was analyzed with an Ametek/Applied  
369 Electrochemistry S-3A analyzers (Pittsburg, PA, USA) and then digitized by Sable Systems UI-2  
370 (Las Vegas, NV, USA) A-D converters and recorded on a Macintosh computer running Warthog  
371 Lab Helper software ([www.warthog.ucr.edu](http://www.warthog.ucr.edu)).

372 Body mass was measured on animals prior to all runs. Mice were then placed on the  
373 treadmill and allowed to adjust for a period of 2-4 minutes. During this time a reference reading  
374 of unbreathed air was obtained. The treadmill was then started at a low speed (approximately  
375 ~0.1m/s), and speed subsequently increased by increments of 0.1m/s every 30-45 seconds until  
376 the mouse could no longer maintain position on the treadmill or  $\dot{V}O_2$  did not increase with  
377 increasing speed. At this time the treadmill was stopped, but  $\dot{V}O_2$  measurements continued for  
378 several minutes during the animal's recovery period before a second reference reading was  
379 recorded.

380  $\dot{V}O_2$  was calculated from  $O_2$  concentrations using the mode 1 equation in Warthog Lab  
381 Analyst software ([www.warthog.ucr.edu](http://www.warthog.ucr.edu)).

$$\dot{V}O_2 = \dot{V} \frac{(F_I O_2 - F_E O_2)}{(1 - F_E O_2)} \quad (1)$$

384  
385 In equation (1)  $\dot{V}$  is flow rate ( $ml \cdot min^{-1}$  STP corrected), and  $F_I O_2$  and  $F_E O_2$  are incurrent  
386 (reference) and excurrent fractional  $O_2$  concentrations respectively ( $F_I O_2$  was assumed to be  
387 0.2095, and  $F_E O_2$  never fell below 0.2080). Due to the size of the treadmill the “instantaneous”  
388 correction was applied to account for mixing (Bartholomew et al., 1981) and better resolve short-  
389 term metabolic changes.  $\dot{V}O_2$  max was calculated as the highest one-minute average during the  
390 running bout or post exercise recovery period.

391  
392 *Dissection and organ measurement*

393 All dissections took place at UCR to ensure consistent processing. After post-acclimation  
394 metabolic measurements were completed, we euthanized mice by overdose of Euthasol (0.07 ml  
395 IP; Virbac Animal Health, Fort Worth, TX, USA). High altitude acclimated mice were sacrificed  
396 within 48 hours of being returned to low altitude. We obtained blood samples by retro-orbital  
397 puncture using heparinized microhematocrit tubes. Hematocrit was calculated from centrifuged  
398 tubes as the proportion of packed cells over the total volume of blood in the tube. The heart was  
399 subsequently removed from the body, cleaned of any connective tissue, fat, and blood contained  
400 within and weighed separately (wet mass). The spleen was treated likewise and weighed for wet

401 mass. Organs were then placed in an oven at 70°C for at least 72 hours and dried to a constant  
402 mass before being reweighed (dry mass).

403 The lungs were fixed by tracheal instillation of a 2.5% buffered glutaraldehyde solution  
404 at a constant airway pressure of 25 cm H<sub>2</sub>O above the sternum for a period of 30 minutes. At the  
405 end of the 30 minutes the tubing leading to the trachea was tied off to maintain the pressure and  
406 the fixative in the lungs. The lungs and tubing were removed from the body and then transferred  
407 to a vial and submerged in the glutaraldehyde solution for a period of 24 hours at 4°C. The fixed  
408 lungs were washed twice in 0.1 M cacodylate buffer (pH 7.4) before being placed in vials with  
409 the buffer and stored at 4°C.

410 Lung volume was measured by immersion displacement directly after removal from the  
411 mouse using the method described by Sherle (1970), and again after being separated into lobes  
412 (lobar volume; right lung: 4 lobes, left lung: 1 lobe).

413

#### 414 *Statistical Analysis*

415 We used a 2x2 factorial design with sex and altitude as the independent variables, and  
416 five dependent variables; dry heart mass, lung volume, hematocrit, and  $\dot{V}\square\text{O}_2$  max (under  
417 normoxia and hypoxia). There were no differences between sex for any dependent variable, so  
418 we combined males and females for the final analysis. Differences between acclimation groups  
419 were determined by analysis of variance (ANOVA) and analysis of covariance (ANCOVA) with  
420 body mass as a covariate. We used repeated measures ANOVA to analyze mass corrected  $\dot{V}\square\text{O}_2$   
421 max data with acclimation altitude as the between subjects factor, and ambient pO<sub>2</sub> during run as  
422 the within subjects factor. A post-hoc Tukey HSD test was used for subsequent pairwise  
423 comparisons. An alpha of 0.05 was used for statistical significance, however we report all values  
424 that approached the threshold of significance. Treatment and error degrees of freedom are  
425 enumerated as subscripts to the F values, and unless otherwise stated all F values come from the  
426 aforementioned analyses. In all cases, means are reported with standard error of the means  
427 (SEM) and are corrected for body mass by adding least square residuals to the grand mean when  
428 appropriate. A list of means for all variables considered in this study can be found in Table 1.

429 In addition to ANOVA, we used a stepwise multiple regression analysis to explore the  
430 relationship between  $\dot{V}\square\text{O}_2$  max and measures that might have an impact on maximal metabolic  
431 output including; lung volume, dry heart mass, and hematocrit. For measures that are typically

432 dependent on body mass ( $V\dot{V}O_2$  max, lobar volume, heart mass), we used mass residuals. The  
433 mass at sacrifice was used for this regression in all cases, including for regression on  $V\dot{V}O_2$  max.  
434 The body mass at sacrifice represented the fully hydrated state of the animals having been moved  
435 between sites, and was measured within five days of both the normoxic and hypoxic runs. In all  
436 cases except dry heart mass, body mass was a significant covariate, but the residuals of the dry  
437 heart mass regression with body mass were still used as it is known that body mass does have an  
438 effect on heart mass in general. We checked for multicollinearity by correlation matrix in all  
439 variables prior to adding them into the model, but correlations between the predictors were  
440 relatively low. Model fit was evaluated by F values and  $R^2$ , and individual regression coefficients  
441 were evaluated by t value and squared semipartial correlation coefficient.

442 As an alternative to multiple regression, residuals of dry heart mass and lobar volume  
443 were standardized as z-scores and added together to get a value of summed cardiopulmonary  
444 size. Residuals of  $V\dot{V}O_2$  max (for both normoxia and hypoxia) were then regressed on  
445 cardiopulmonary size and presented in graphically.

446

#### 447 **Acknowledgments**

448 The mice used in this research were covered by the UCR Animal Care Protocol # A-  
449 20120013BE. We thank Sonia Diaz, Connie Hsia and Cathy Thaler for their assistance in  
450 developing the lung fixation protocol used. Thanks to Matt Van Sant, Nyles Oune, and Jamie  
451 Dolan for their assistance in the laboratory with  $VO_2$  measurements. We thank all the staff of the  
452 White Mountain Research Station and the UC Riverside vivarium staff for their assistance with  
453 the animals. Lastly, thank you to Mark Chappell and Richard Cardullo for their comments in  
454 early drafts of the manuscripts.

455

#### 456 **Funding**

457 This project was made possible primarily with funds from the UCR Academic Senate to K.A.H,  
458 and Sigma Xi GIAR [G20120315159668] to N.J.S.

459

#### 460 **Author Contributions**

461 Both K.A.H. and N.J.S. were involved in the process of developing the project. N.J.S. was  
462 primarily responsible for conducting the experiment and subsequent data analysis. N.J.S. also  
463 was responsible for preparing the manuscript, with editing from K.A.H.

464

465 **List of Abbreviations**

466 HA – High altitude acclimated mice

467 LA – Low altitude acclimated mice

468  $VO_2$  max – Maximal oxygen consumption

469 IP – Intraperitoneal Injection

470 UCR – University of California Riverside



471 **References**

- 472 **Bartholomew, G. A., Vleck, D. and Vleck, C. M.** (1981). Instantaneous Measurements of  
473 Oxygen Consumption During Pre-Flight Warm-Up and Post-Flight Cooling in Sphingid  
474 and Saturniid Moths. *Journal of Experimental Biology* **90**, 17–32.
- 475 **Baker, C. H. and Remington, J. W.** (1960). Role of the spleen in determining total body  
476 hematocrit. *American Journal Physiology* **198**, 906–910.
- 477 **Basset, D. and Howley, E.** (2000). Limiting factors for maximum oxygen uptake and  
478 determinants of endurance performance.pdf. *Medicine and Science in Sports and*  
479 *Exercise* 70–84.
- 480 **Beaudry, J. L. and McClelland, G. B.** (2010). Thermogenesis in CD-1 mice after combined  
481 chronic hypoxia and cold acclimation. *Comparative Biochemistry and Physiology Part B:*  
482 *Biochemistry and Molecular Biology* **157**, 301–309.
- 483 **Böning, D., Maassen, N. and Pries, A.** (2010). The Hematocrit Paradox - How Does Blood  
484 Doping Really Work? *International Journal of Sports Medicine* **32**, 242–246.
- 485 **Burggren, W. and Mwalukoma, A.** (1983). Respiration during chronic hypoxia and hyperoxia  
486 in larval and adult bullfrogs (*Rana catesbeiana*). I. Morphological responses of lungs,  
487 skin and gills. *Journal of Experimental Biology* **105**, 191–203.
- 488 **Burri, P. H. and Weibel, E. R.** (1971). Morphometric estimation of pulmonary diffusion  
489 capacity: II. Effect of PO<sub>2</sub> on the growing lung adaption of the growing rat lung to  
490 hypoxia and hyperoxia. *Respiration Physiology* **11**, 247–264.
- 491 **Chappell, M. A. and Snyder, L. R.** (1984). Biochemical and physiological correlates of deer  
492 mouse alpha-chain hemoglobin polymorphisms. *Proceedings of the National Academy of*  
493 *Sciences* **81**, 5484–5488.
- 494 **Chappell, M. A., Hammond, K. A., Cardullo, R. A., Russell, G. A., Rezende, E. L. and**  
495 **Miller, C.** (2007). Deer Mouse Aerobic Performance across Altitudes: Effects of  
496 Developmental History and Temperature Acclimation. *Physiological and Biochemical*  
497 *Zoology* **80**, 652–662.
- 498 **Chappell, M. A., Hayes, J. P. and Snyder, L. R. G.** (1988). Hemoglobin Polymorphisms in  
499 Deer Mice (*Peromyscus maniculatus*): Physiology of Beta-Globin Variants and Alpha-  
500 Globin Recombinants. *Evolution* **42**, 681–688.

- 501 **Chappell, M. A., Bachman, G. C. and Odell, J. P.** (1995). Repeatability of Maximal Aerobic  
502 Performance in Belding's Ground Squirrels, *Spermophilus beldingi*. *Functional Ecology*  
503 **9**, 498–504.
- 504 **Cheviron, Z. A., Bachman, G. C., Connaty, A. D., McClelland, G. B. and Storz, J. F.** (2012).  
505 Regulatory changes contribute to the adaptive enhancement of thermogenic capacity in  
506 high-altitude deer mice. *Proceedings of the National Academy of Sciences* **109**, 8635–  
507 8640.
- 508 **Cheviron, Z. A., Bachman, G. C. and Storz, J. F.** (2013). Contributions of phenotypic  
509 plasticity to differences in thermogenic performance between highland and lowland deer  
510 mice. *Journal of Experimental Biology* **216**, 1160–1166.
- 511 **Cheviron, Z. A., Connaty, A. D., McClelland, G. B. and Storz, J. F.** (2014). Functional  
512 Genomics of Adaptation to Hypoxic Cold-Stress in High-Altitude Deer Mice:  
513 Transcriptomic Plasticity and Thermogenic Performance. *Evolution* **68**, 48–62.
- 514 **Garland, T. and Carter, P. A.** (1994). Evolutionary Physiology. *Annual Review of Physiology*  
515 **56**, 579–621.
- 516 **Hammond, K. ., Chappell, M. . and Kristan, D. .** (2002). Developmental plasticity in aerobic  
517 performance in deer mice (*Peromyscus maniculatus*). *Comparative Biochemistry and*  
518 *Physiology - Part A: Molecular & Integrative Physiology* **133**, 213–224.
- 519 **Hammond, K. A., Roth, J., Janes, D. N. and Dohm, M. R.** (1999). Morphological and  
520 Physiological Responses to Altitude in Deer Mice *Peromyscus maniculatus*.  
521 *Physiological and Biochemical Zoology* **72**, 613–622.
- 522 **Hammond, K. A., Szewczak, J. and Król, E.** (2001). Effects of Altitude and Temperature on  
523 Organ Phenotypic Plasticity Along an Altitudinal Gradient. *Journal of Experimental*  
524 *Biology* **204**, 1991–2000.
- 525 **Hayes, J. P.** (1989). Field and Maximal Metabolic Rates of Deer Mice (*Peromyscus*  
526 *maniculatus*) at Low and High Altitudes. *Physiological Zoology* **62**, 732–744.
- 527 **Hsia, C. C. W., Carbayo, J. J. P., Yan, X. and Bellotto, D. J.** (2005). Enhanced alveolar  
528 growth and remodeling in Guinea pigs raised at high altitude. *Respiratory Physiology &*  
529 *Neurobiology* **147**, 105–115.
- 530 **Hsia, C. C. W., Johnson, R. L., McDonough, P., Dane, D. M., Hurst, M. D., Fehmel, J. L.,**  
531 **Wagner, H. E. and Wagner, P. D.** (2007). Residence at 3,800-m altitude for 5 mo in

- 532 growing dogs enhances lung diffusing capacity for oxygen that persists at least 2.5 years.  
533 *Journal of Applied Physiology* **102**, 1448–1455.
- 534 **Lechner, A. J. and Banchero, N.** (1980). Lung morphometry in guinea pigs acclimated to  
535 hypoxia during growth. *Respiration Physiology* **42**, 155–169.
- 536 **Lomholt, J. P. and Johansen, K.** (1979). Hypoxia Acclimation in Carp: How It Affects O<sub>2</sub>  
537 Uptake, Ventilation, and O<sub>2</sub> Extraction from Water. *Physiological Zoology* **52**, 38–49.
- 538 **McLaughlin, D. W. and Meints, R. H.** (1972). A study of hibernator erythropoietic responses  
539 to simulated high altitude. *Comparative Biochemistry and Physiology Part A: Physiology*  
540 **42**, 655–666.
- 541 **Moritz, C., Patton, J. L., Conroy, C. J., Parra, J. L., White, G. C. and Beissinger, S. R.**  
542 (2008). Impact of a Century of Climate Change on Small-Mammal Communities in  
543 Yosemite National Park, USA. *Science* **322**, 261–264.
- 544 **Rabinovitch, M., Gamble, W. J., Miettinen, O. S. and Reid, L.** (1981). Age and sex influence  
545 on pulmonary hypertension of chronic hypoxia and on recovery. *American Journal of*  
546 *Physiology Heart and Circulatory Physiology* **240**, H62–H72.
- 547 **Reinke, C., Bevans-Fonti, S., Grigoryev, D. N., Drager, L. F., Myers, A. C., Wise, R. A.,**  
548 **Schwartz, A. R., Mitzner, W. and Polotsky, V. Y.** (2011). Chronic intermittent hypoxia  
549 induces lung growth in adult mice. *American Journal of Physiology - Lung Cellular and*  
550 *Molecular Physiology* **300**, L266 –L273.
- 551 **Rezende, E. L., Chappell, M. A. and Hammond, K. A.** (2004). Cold-acclimation in  
552 *Peromyscus*: temporal effects and individual variation in maximum metabolism and  
553 ventilatory traits. *Journal of Experimental Biology* **207**, 295 –305.
- 554 **Rezende, E. L., Hammond, K. A. and Chappell, M. A.** (2009). Cold acclimation in  
555 *Peromyscus*: individual variation and sex effects in maximum and daily metabolism,  
556 organ mass and body composition. *Journal of Experimental Biology* **212**, 2795 –2802.
- 557 **Russell, G. A., Rezende, E. L. and Hammond, K. A.** (2008). Development partly determines  
558 the aerobic performance of adult deer mice, *Peromyscus maniculatus*. *Journal of*  
559 *Experimental Biology* **211**, 35 –41.
- 560 **Sawin, C. F.** (1970). Sea-level and high-altitude breeding colonies of *Peromyscus maniculatus*  
561 *sonoriensis*. *American Journal of Physiology* **218**, 1263–1266.

- 562 **Snyder, L. R. G., Hayes, J. P. and Chappell, M. A.** (1988). Alpha-Chain Hemoglobin  
563 Polymorphisms are Correlated with Altitude in the Deer Mouse, *Peromyscus*  
564 *maniculatus*. *Evolution* **42**, 689–697.
- 565 **Storz, J. F., Sabatino, S. J., Hoffmann, F. G., Gering, E. J., Moriyama, H., Ferrand, N.,**  
566 **Monteiro, B. and Nachman, M. W.** (2007). The molecular basis of high-altitude  
567 adaptation in deer mice. *PLoS Genetics* **3**, e45.
- 568 **Storz, J. F., Runck, A. M., Sabatino, S. J., Kelly, J. K., Ferrand, N., Moriyama, H., Weber,**  
569 **R. E. and Fago, A.** (2009). Evolutionary and functional insights into the mechanism  
570 underlying high-altitude adaptation of deer mouse hemoglobin. *Proceedings of the*  
571 *National Academy of Sciences*. **106**, 14450-14455.
- 572 **Storz, J. F., Runck, A. M., Moriyama, H., Weber, R. E., Fago, A.** (2010a) Genetic differences  
573 in hemoglobin function between highland and lowland deer mice. *Journal of*  
574 *Experimental Biology*, **213**: 2565-2574.
- 575 **Storz, J. F., Scott, G. R. and Cheviron, Z. A.** (2010b). Phenotypic plasticity and genetic  
576 adaptation to high-altitude hypoxia in vertebrates. *Journal of Experimental Biology* **213**,  
577 4125 –4136.
- 578 **Templeman, N. M., Beaudry, J. L., Le Moine, C. M. R. and McClelland, G. B.** (2010).  
579 Chronic hypoxia- and cold-induced changes in cardiac enzyme and gene expression in  
580 CD-1 mice. *Biochimica et Biophysica Acta (BBA) - General Subjects* **1800**, 1248–1255.
- 581 **Tufts, D. M., Revsbech, I. G., Cheviron, Z. A., Weber, R. E., Fago, A. and Storz, J. F.**  
582 (2013). Phenotypic plasticity in blood–oxygen transport in highland and lowland deer  
583 mice. *Journal of Experimental Biology* **216**, 1167–1173.
- 584 **Van Bui, M. and Banchemo, N.** (1980). Effects of chronic exposure to cold or hypoxia on  
585 ventricular weights and ventricular myoglobin concentrations in guinea pigs during  
586 growth. *Pflugers Archiv* **385**, 155–160.
- 587 **Van Sant, M. J. and Hammond, K. A.** (2008). Contribution of Shivering and Nonshivering  
588 Thermogenesis to Thermogenic Capacity for the Deer Mouse (*Peromyscus maniculatus*).  
589 *Physiological and Biochemical Zoology* **81**, 605–611.
- 590 **Van Sant, M. J.** (2012). *The Physiological Ecology of Mammals in Extreme Environments*.  
591 Ph.D. UC Riverside 92 – 120.

- 592 **Weibel, E. R., Taylor, C. R., Gehr, P., Hoppeler, H., Mathieu, O. and Maloij, G. M. O.**  
593 (1981). Design of the mammalian respiratory system. IX. Functional and structural limits  
594 for oxygen flow. *Respiration Physiology* **44**, 151–164.
- 595 **Weibel, E. R., Richard Taylor, C. and Hoppeler, H.** (1992). Variations in function and design:  
596 Testing symmorphosis in the respiratory system. *Respiration Physiology* **87**, 325–348.
- 597 **Yilmaz, C., Merrill Dane, D. and Hsia, C. C. W.** (2007). Alveolar diffusion-perfusion  
598 interactions during high-altitude residence in guinea pigs. *Journal of Applied Physiology*  
599 **102**, 2179 –2185.  
600

601 Fig. 1. **Experimental design employed in this study.** All mice (black, N=18) were run at low  
602 altitude (150 mmHg) initially, and then acclimated either to 3800 m (blue, n=10) or 340 m (red,  
603 n=8) for a period of 9 weeks. At the end of the acclimation period all mice were run at low (150  
604 mmHg) and high (100 mmHg) altitude before being brought to UCR for final processing.

605  
606 Fig. 2. **Depicts the mean value of traits (A, body mass; B, hematocrit; C, heart mass; D,**  
607 **lobar volume) at time of sacrifice in deer mice from the two different acclimation altitudes.**  
608 Asterisks indicate statistically significant differences between acclimation groups. Values are  
609 means  $\pm$ 1 SEM. (N as in text).

610  
611 Fig. 3. **Depicts  $VO_2$  max (ml/min) in both high acclimated (blue) and low acclimated (red)**  
612 **deer mice from the three  $VO_2$  max measurements.** Post hoc results are indicated. Letters that  
613 are different from each other indicate statistically significant differences within groups; asterisks  
614 indicate significant differences between groups. Values are least squares means of body mass  $\pm$ 1  
615 SEM. (N as in text).

616  
617 Fig. 4. **Depicts the regression of  $VO_2$  max residuals from normoxic (A) and hypoxic (B)**  
618 **conditions regressed against the summed standardized residuals of dry heart mass and**  
619 **lobar volume.** High acclimated (blue) and low acclimated (red) individuals are marked by color.  
620 Also shown are the line of best fit and the 95% confidence interval of the line.

621  
622  
623  
624  
625  
626  
627  
628  
629  
630  
631

| <b>Table 1</b>                                                                        | Low acclimated (n=8) |        | High acclimated (n=10) |        |
|---------------------------------------------------------------------------------------|----------------------|--------|------------------------|--------|
|                                                                                       | Mean                 | ±SEM   | Mean                   | ±SEM   |
| <b>Body mass (g)</b>                                                                  |                      |        |                        |        |
| Pre-acclimation                                                                       | 23.97                | 0.74   | 24.44                  | 0.78   |
| Post acclimation                                                                      | 24.01                | 0.76   | 23.52                  | 0.60   |
| <b>Hematocrit (%)</b>                                                                 | 47.04                | 0.83   | 46.90                  | 1.55   |
| <b>Dry spleen mass (g)</b>                                                            | 0.0069               | 0.0006 | 0.0076                 | 0.0016 |
| <b>Heart mass (g)</b>                                                                 |                      |        |                        |        |
| Wet                                                                                   | 0.177                | 0.005  | 0.190                  | 0.006  |
| Dry                                                                                   | 0.038                | 0.002  | 0.042                  | 0.002  |
| <b>Lung volume (ml)</b>                                                               |                      |        |                        |        |
| Whole                                                                                 | 0.840*               | 0.019  | 0.909*                 | 0.017  |
| Lobar                                                                                 | 0.732*               | 0.025  | 0.797*                 | 0.018  |
| <b>VO<sub>2</sub> max (ml•min<sup>-1</sup>)</b>                                       |                      |        |                        |        |
| Hypoxia                                                                               | 3.77*                | 0.19   | 4.38*                  | 0.09   |
| Normoxia                                                                              | 4.52                 | 0.14   | 4.81                   | 0.10   |
| Values for heart mass, lung volume, and VO <sub>2</sub> max are mass corrected means. |                      |        |                        |        |
| * Asterisks indicate significant differences between groups                           |                      |        |                        |        |

632

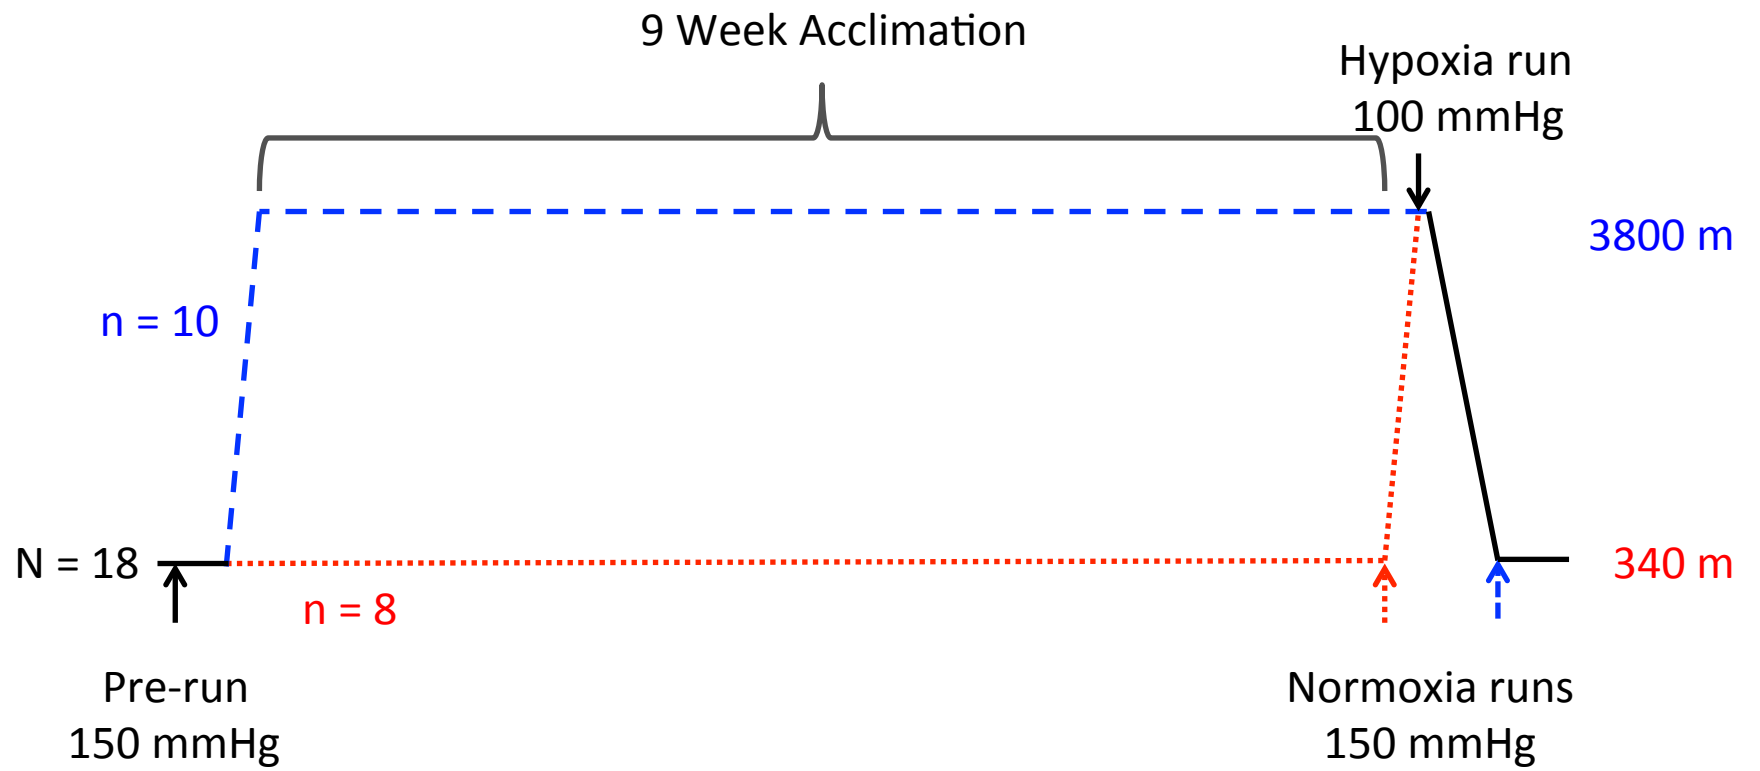



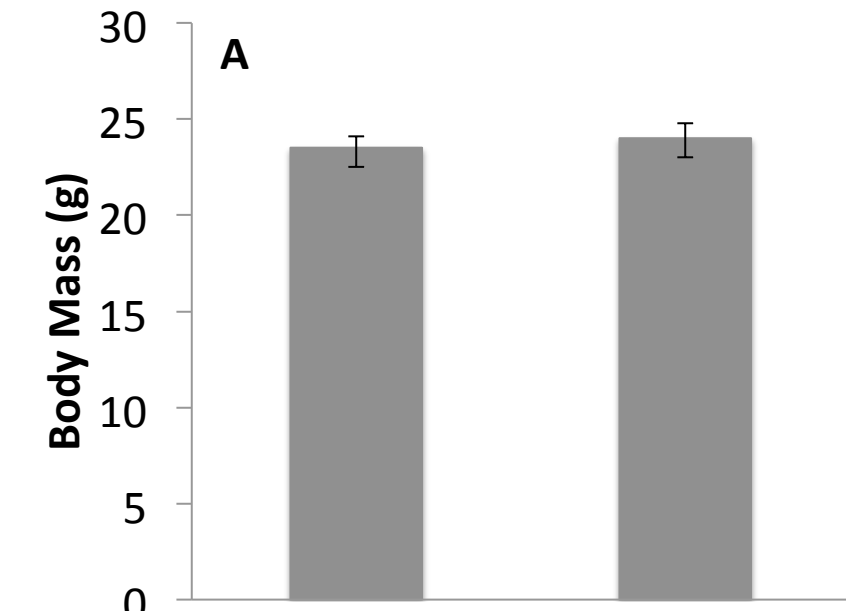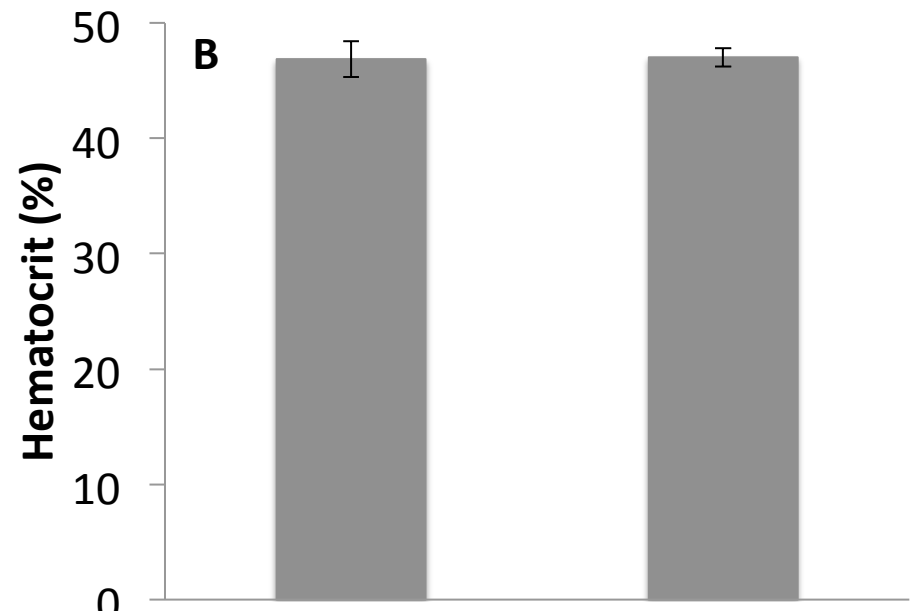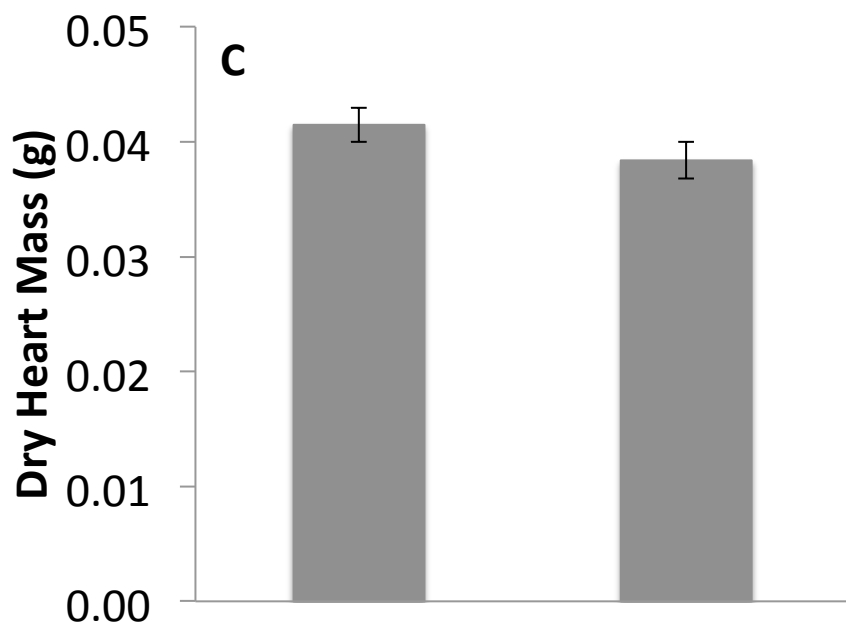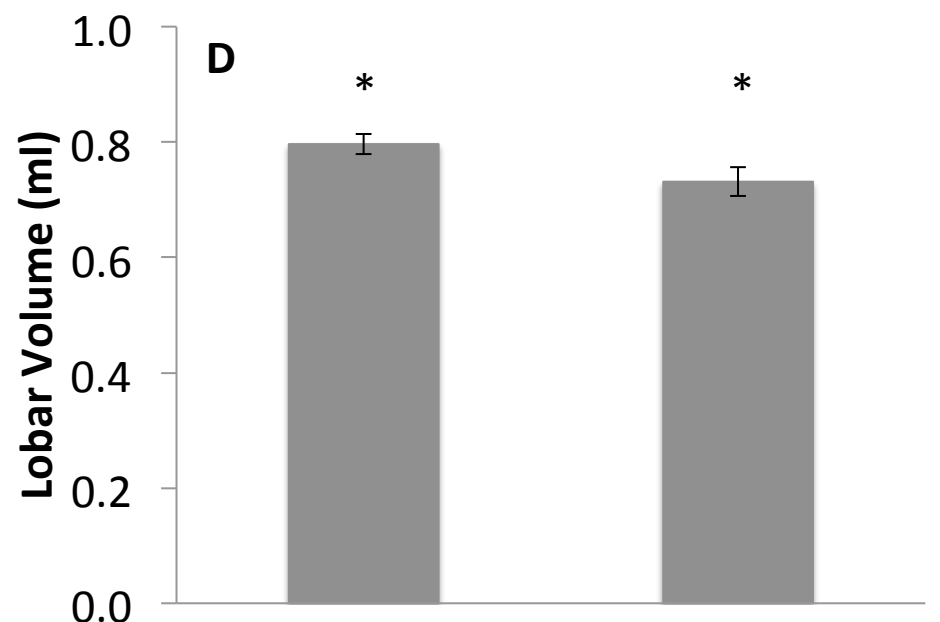

3800 m      340 m

**Acclimation Altitude**

3800 m      340 m

**Acclimation Altitude**

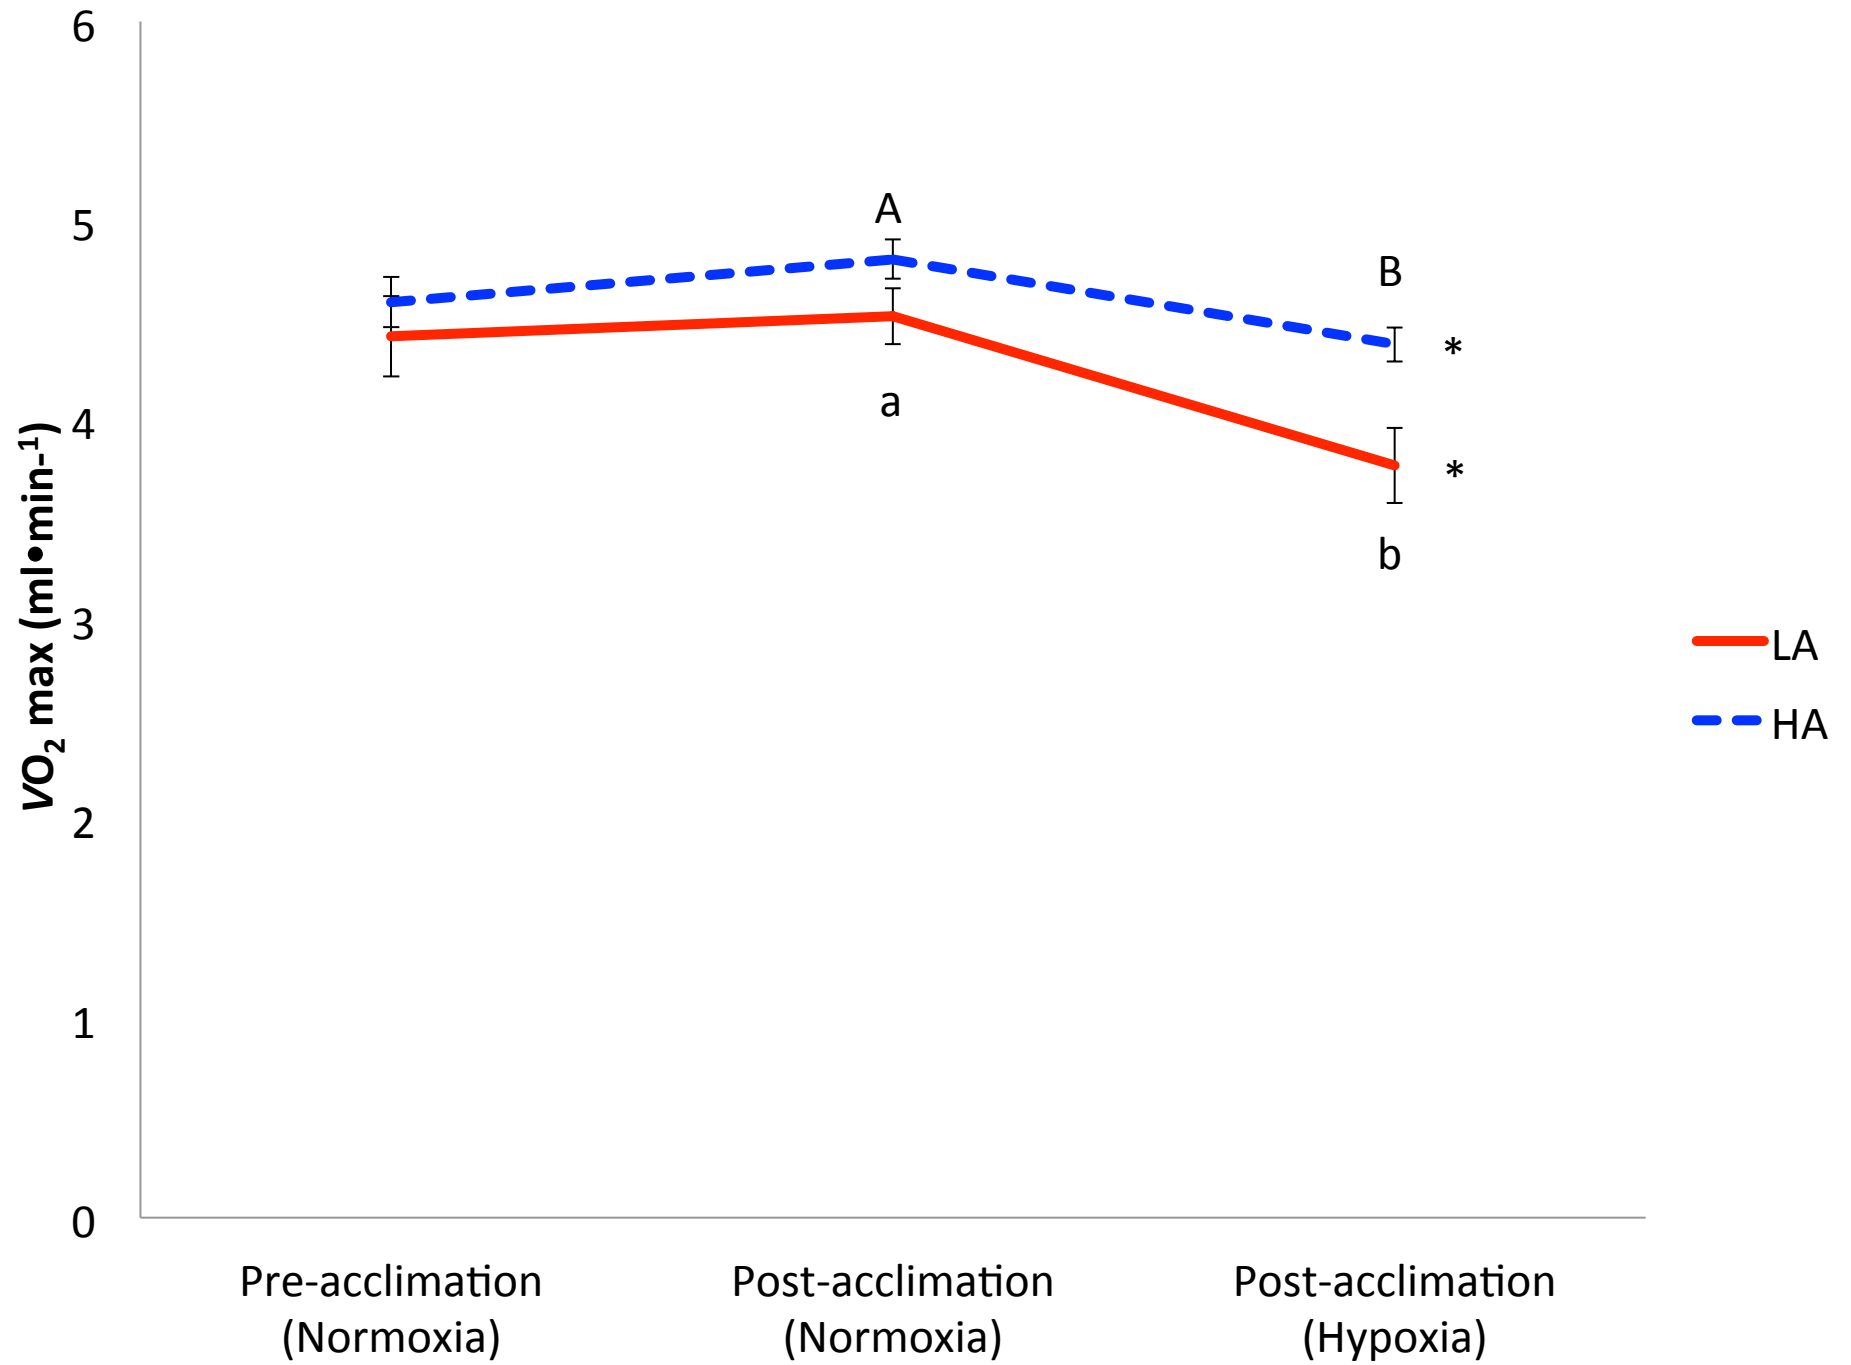

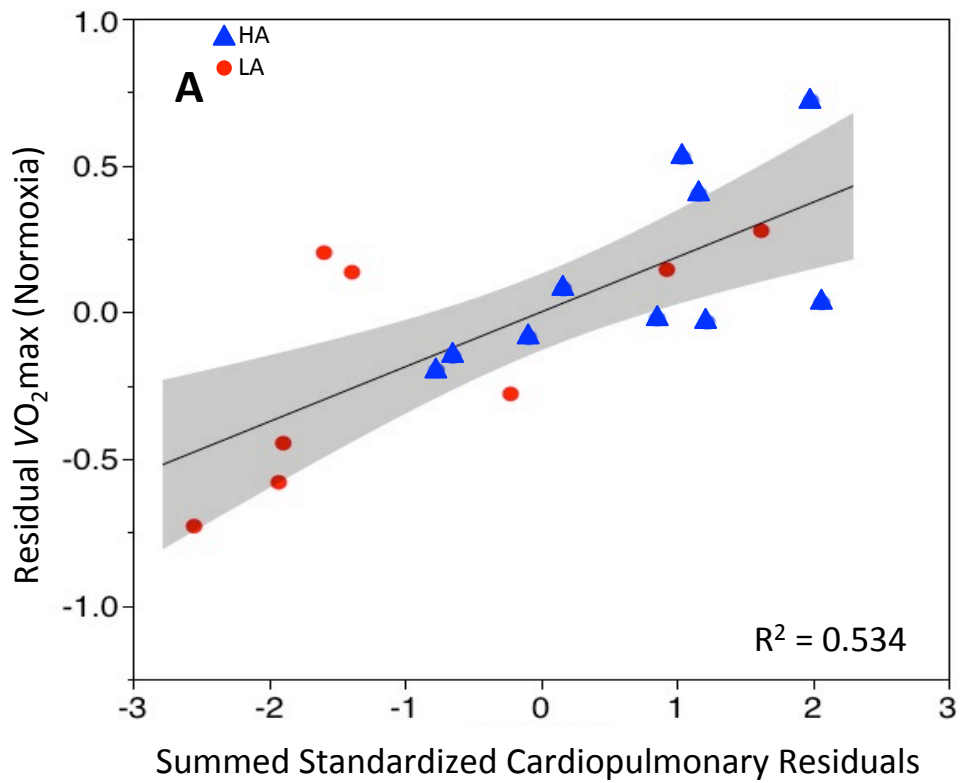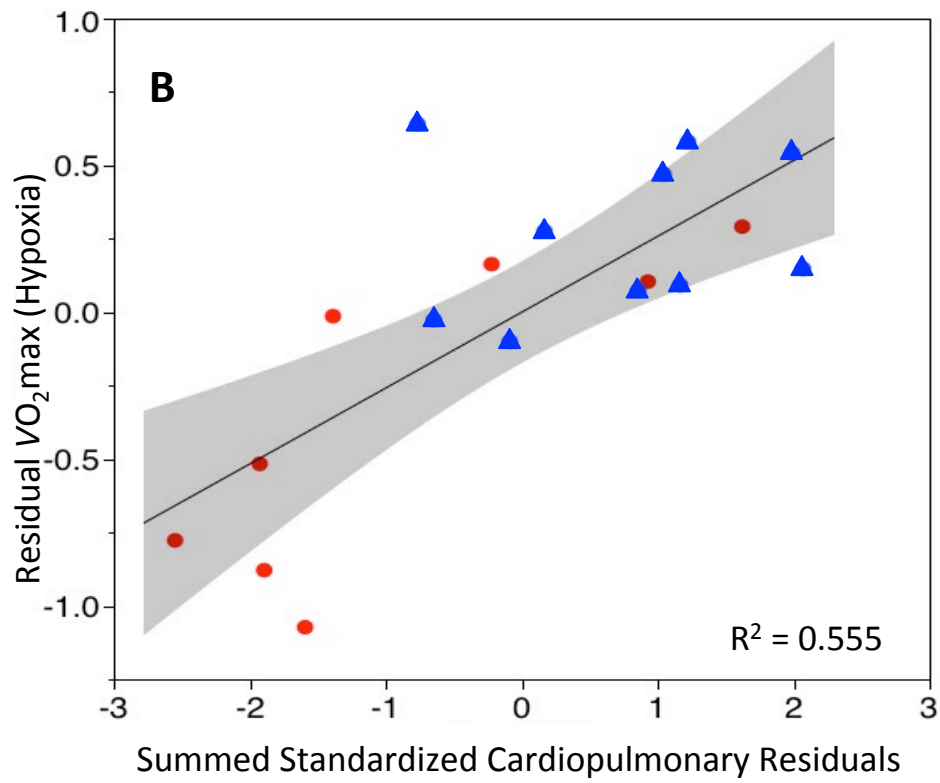

Source: https://cob.silverchair.com/jeb/article-pdf/doi/10.1242/jeb.103713/2038002/jeb_103713.pdf
